# Supplementary material for: Heart rate variability over the decades: a scoping review
Source: PeerJ journal article supplement (doi:10.7717/peerj.19347), 2025-04-29
Supplement: SuppTables.pdf [file SuppTables.pdf]

## Supplementary Material

Supplementary table S1 contains information related to contemporary wearable devices with HRV measuring technology. The manufacturing year, if the device is tested against the gold standard and FDA approval information is taken from their respective sites. The supplementary table S2 contains a summary of all the articles that are included in the scoping review.

Table S1: Contemporary wearable devices/software with HRV measurement

| Device                                                   | Year | Features                                                                    | FDA Approval                | Tested Against Standard          |
|----------------------------------------------------------|------|-----------------------------------------------------------------------------|-----------------------------|----------------------------------|
| Polar S810                                               | 2001 | HR, VO2max, HRV measurements                                                | No                          | Yes                              |
| Polar S810i                                              | 2002 | HR, predicts maximal oxygen uptake, HRV measurements                        | No                          | Yes                              |
| Actiheart (CamNtech Ltd., Cambridgeshire, UK)            | 2003 | Combined HR and activity monitor                                            | -                           | Mixed results, valid during rest |
| SUUNTO t6                                                | 2004 | HR and HRV                                                                  | No                          | Yes                              |
| Kubios HRV software                                      | 2004 | Full featured HRV analysis, ECG, PPG, and HR data                           | No, categorized as low-risk | Yes, with good accuracy          |
| Polar RS800                                              | 2005 | Comprehensive athletic training features, HRV                               | No                          | Yes                              |
| irhythm Zio                                              | 2006 | ECG Chest patch monitor                                                     | Yes                         | Yes                              |
| Polar RS800G3                                            | 2008 | Comprehensive athletic training features, HRV                               | No                          | Yes                              |
| Actigraph wGT3X-BT (Actigraph, Pensacola, United States) | 2009 | HR monitor, sleep/wake monitor                                              | -                           | Mixed results, valid during rest |
| Motorola Droid                                           | 2009 | HRV measured using mobile camera with an app                                | No                          | Yes                              |
| Polar RS800CX                                            | 2009 | Comprehensive athletic training features, HRV                               | No                          | Yes                              |
| Zephyr Bioharness 3                                      | 2011 | Tracks HR, breathing rate, core body temperature, posture, and activity     | Yes                         | Poor validity                    |
| iPhone 4S                                                | 2011 | HRV measured using mobile camera with an app                                | No                          | Yes                              |
| Equivital EQ-02 (Equivital, Cambridge, UK)               | 2012 | Comprehensive biometric monitoring                                          | -                           | Mixed results, valid during rest |
| Polar H7                                                 | 2012 | Tracks HR and measures HRV                                                  | No                          | Mixed results                    |
| Ithlete PPG                                              | 2012 | Measures HRV                                                                | No                          | Mixed results, valid during rest |
| Hexoskin                                                 | 2013 | ECG, HR, HRV, QRS events, HR Zones, HR Maximum, Resting HR, and HR Recovery | No                          | Yes                              |
| Ithlete Chest Strap                                      | 2013 | HR, HRV                                                                     | -                           | Limited research                 |
| HRV4Training PPG                                         | 2014 | Mobile application for HRV insights                                         | No                          | Yes                              |
| Polar V800                                               | 2014 | HR and HRV                                                                  | No                          | Yes                              |
| Empatica E4 (Empatica Inc, Boston, United States)        | 2015 | PPG sensor for HRV, EDA sensor, skin temperature, motion-based activity     | Yes                         | Mixed results, valid during rest |
| Apple Watch                                              | 2015 | Tracks HR and measures HRV                                                  | Yes                         | Valid during all conditions      |

Continued on next page

Table S1 continued from previous page

| Device                                                        | Year      | Features                                                                                                 | FDA Ap-<br>proval | Tested<br>Against Stan-<br>dard  |
|---------------------------------------------------------------|-----------|----------------------------------------------------------------------------------------------------------|-------------------|----------------------------------|
| Whoop                                                         | 2015      | HR, HRV, blood oxygenation levels, breathing rate, and skin temperature                                  | No                | Yes                              |
| Oura Ring                                                     | 2015      | HRV, blood oxygen rate, body temperature, and sleep duration                                             | No                | Yes                              |
| AidlabTM (AidlabTM, Gdańsk, Poland)                           | 2017      | Personal insights, HRV analysis, activity tracking, skin temperature, heart monitoring, respiration rate | -                 | Mixed results, valid during rest |
| Polar H10 (Polar Electro UK Ltd., Warwick, UK)                | 2017      | ECG HR monitor                                                                                           | No                | Good to excellent validity       |
| Biovotion Everion® (Biofourmis, Boston, United States)        | 2017      | HR, respiratory rate, and blood oxygen saturation, skin temperature                                      | Yes               | Mixed results, valid during rest |
| Polar OH1                                                     | 2017      | Optical HR sensor, upper arm band                                                                        | No                | Yes, with good accuracy          |
| Polar Vantage V (Polar Electro UK Ltd., Warwick, UK)          | 2018      | HR and HRV                                                                                               | No                | n/a                              |
| Fitbit Versa smartwatch                                       | 2018      | Tracks steps, distance, sleep, stress, HR, and calories                                                  | Yes               | Yes, with good accuracy          |
| Garmin Vivosmart 4                                            | 2018      | Tracks HR, sleep, stress, body energy, activity                                                          | No                | Yes, with good accuracy          |
| Garmin Fenix® 6X and 6S (Garmin Ltd., Southampton, UK)        | 2019      | HRV tracking, VO2 max capacity, resting HR, Fast/slow HR notifications                                   | -                 | Poor validity                    |
| Wahoo TICKR X                                                 | 2020      | Tracks HR, calories, workout in real time, chest strap                                                   | No                | Yes                              |
| Apple Watch 6                                                 | 2020      | Tracks HR and notifies irregular rhythms, Measures ECG                                                   | Yes               | Valid during all conditions      |
| Fitbit Luxe                                                   | 2021      | Tracks HR, HRV, SpO2, breathing rate, skin temperature, sleep                                            | Yes               | Yes                              |
| Fitbit Charge 5                                               | 2021      | Tracks HR, HRV, SpO2, breathing rate, skin temperature, sleep                                            | Yes               | Yes                              |
| Garmin Tactix® CharlieDelta (Garmin Ltd., Southampton, UK)    | 2018/2020 | HR Monitor                                                                                               | Pulse Ox          | Yes                              |
| Bittium Faros TM (Bittium, Oulu, Finland)                     | 2018      | ECG recordings, intelligent arrhythmia detection, HRV                                                    | Yes               | Good to excellent validity       |
| Bodyguard 2 (Firstbeat Technologies Ltd., Jyväskylä, Finland) | -         | HR, HRV, Respiration rate, Blood oxygen saturation, and exercise                                         | -                 | Yes                              |
| Elite HRV                                                     | 2022      | HRV software                                                                                             | No                | Yes                              |
| Polar T31                                                     | -         | HR and HRV                                                                                               | No                | Yes, but lacks literary evidence |

Table S2: All articles summary table

| Reference | Year | Condition                                                                                                                                                                             | HRV metrics                                                                                                                                             | Confounding factors                                                                                                                                                     | Spectral analysis                      | Recording technique                               |
|-----------|------|---------------------------------------------------------------------------------------------------------------------------------------------------------------------------------------|---------------------------------------------------------------------------------------------------------------------------------------------------------|-------------------------------------------------------------------------------------------------------------------------------------------------------------------------|----------------------------------------|---------------------------------------------------|
| [1]       | 1990 | Acute myocardial infarction(HRV↓)                                                                                                                                                     | An instantaneous change in HR can be expressed as the ratio (min RR)/(max RR)20 (e.g. the Valsalva ratio), or as the difference (max RR)-(min RR), SDNN | Age, gender, infarct site, ejection fraction, and beta-blocker treatment                                                                                                | Spectral Analysis and Auto-correlation | Holter records 24-hr, 24-hr ECGs                  |
| [2]       | 1993 | Sudden death, Congestive heart failure, CHF, Diabetes, Alcoholic cardiomyopathy                                                                                                       | SDNN, SDANN, RMSSD, SDNNIDX, PNN50, Baseline width, PSD, HF, LF, ULF, VLF, TP.                                                                          | Medications                                                                                                                                                             | Fast fourier transform(FFT)            | Holter recordings, 24-hr ambulatory ECG.          |
| [3]       | 1995 | Coronary artery disease (HRV↓), Mitral valve disease(HRV↓), Sleep apnea, Hypertensive patients (HRV↓)                                                                                 | SDNN, SDANN, SD index, PNN50, RMSSD, PSD, LF, HF                                                                                                        | Age (HRV↓), Exercise, Respiratory cycle, Blood pressure, Circadian variations, Intervention programs, Behavioral, Physiological, occupational and environmental factors | FFT                                    | Holter recordings                                 |
| [4]       | 1995 | Deep breathing, Mortality, Sudden cardiac arrest, Myocardial infraction, Congestive heart failure, Diabetes, Renal disease, Hypertention, Autonomic neuropathy, Sudden death syndrome | SDANN, 24-hr SD, SD, RMSSD, RR50, %RR50                                                                                                                 | Exercise                                                                                                                                                                | FFT and Autoregressive (AR)            | Holter tapes                                      |
| [5]       | 1996 | Ischemic heart disease(LF/HF ↑), Myocardial infarction, Essential arterial hypertension (LF ↑), Chronic heart failure (PNS ↓)                                                         | SDRR, HF, LF, VLF                                                                                                                                       | Posture (tilt and rest), Arterial pressure variability                                                                                                                  | FFT and AR modelling                   | Holter tapes                                      |
| [6]       | 1997 | Diabetic Neuropathy, Heart Transplantation, Congestive Heart Failure, Left Ventricular Hypertrophy, Risk Stratification after Myocardial Infarction, Ventricular Arrhythmias          | SDNN,SDANN,TINN,PNN50,RMSSD, PSD, HF,LF                                                                                                                 | Not Available                                                                                                                                                           | Not Available                          | ECG recordings and Ambulatory ECG                 |
| [7]       | 1998 | Acute Myocardial Infarction, cardiac transplantation, Congestive heart failure, Cardioneurogenic syncope, Diabetic autonomic neuropathy, Depressive disorder, Ejection fraction       | SDNN, triangular index, SDANN, RMSSD, PSD, HF, LF, ULF, VLF, PNN50, TINN, SDSD, NN50 Count, Differential index, logarithmic index, LF/HF                | Not Available                                                                                                                                                           | Not Available                          | Holter recordings                                 |
| [8]       | 1999 | Mortality, Arrhythmic death, Coronary events, Heart failure, Acute myocardial infarction                                                                                              | SDNN, Geometric triangular analysis, Poincare plot analysis, Fractal analysis methods                                                                   | Not Available                                                                                                                                                           | Not Available                          | Holter recordings and 24-hr ambulatory recordings |

Continued on next page

Table S2 continued from previous page

| Reference | Year | Condition                                                                                                                                                                                                   | HRV metrics                                                                                                                                                                          | Confounding factors                                                                                                                                                                                                                                                                                                                                                             | Spectral analysis                    | Recording technique     |
|-----------|------|-------------------------------------------------------------------------------------------------------------------------------------------------------------------------------------------------------------|--------------------------------------------------------------------------------------------------------------------------------------------------------------------------------------|---------------------------------------------------------------------------------------------------------------------------------------------------------------------------------------------------------------------------------------------------------------------------------------------------------------------------------------------------------------------------------|--------------------------------------|-------------------------|
| [9]       | 1999 | Myocardial infraction, Sudden death, Malignant ventricular arrhythmias, Morbidity and mortality, Congestive heart failure, Diabetes                                                                         | SDNN, SDANN, SDNNIDX, PNN50, RMSSD, HF, LF, VLF, ULF, TP, LF/HF                                                                                                                      | Age                                                                                                                                                                                                                                                                                                                                                                             | Not Available                        | 24-hr Holter recordings |
| [10]      | 1999 | Not Available                                                                                                                                                                                               | SDNN, Triangular index, SDANN, RMSSD, coefficient of variance of RR interval (CV-RR), LF, HF, LF/HF                                                                                  | RSA, MWSA (Mayer-wave-related sinus arrhythmia)                                                                                                                                                                                                                                                                                                                                 | FFT and maximum entropy method (MEM) | ECG, Tachogram          |
| [11]      | 2002 | Mental and physical stress, Verbalization during mental activity noticeably influences, Congestive heart failure, Post-infarction arrhythmias, Hypertension, Diabetic patients, Acute myocardial infarction | SDNN, RMSSD, PNN50, SDANN, Histogram of the NN-intervals, Lorentz-plot (or Poincaré-plot)                                                                                            | Aging(lower in women compared to men)                                                                                                                                                                                                                                                                                                                                           | FFT and AR Modeling                  | Holter monitors         |
| [12]      | 2002 | Mortality, Coronary artery diseases, Hypertention, Congestive heart failure, Sudden cardiac death                                                                                                           | SDNN, Triangular index, HF, LF, LF/HF, Fractal correlation                                                                                                                           | Pharmacological interventions                                                                                                                                                                                                                                                                                                                                                   | Not Available                        | Holter systems          |
| [13]      | 2003 | Not Available                                                                                                                                                                                               | Not Available                                                                                                                                                                        | Age, Gender, Genetic factors Smoking, Caffeine, Posture, Physical activity, Respiratory activity, Blood pressure variability, Central mechanisms (emotion, stress, sleep, mental activity, arousal), Arterial baroreflex SNS, PMS, Humoral factors (plasma catecholamines, thyroid hormones), Pharmacological treatment (sympatholytic agents, digitalis, antiarrhythmic drugs) | Not Available                        | Not Available           |
| [14]      | 2005 | All-Cause or Cardiac Mortality After myocardial infraction, Therapeutics                                                                                                                                    | SDNN, SDANN, ASDNN (index), RMSSD, NN50, PNN50, Night-day difference, LF, HF, VLF, ULF, Power law slope, The short- and long-term fractal-scaling exponent, and SD12, Poincare plots | Not Available                                                                                                                                                                                                                                                                                                                                                                   | FFT and AR techniques                | ECG recordings          |

Continued on next page

Table S2 continued from previous page

| Reference | Year | Condition                                                                                                                                                                                                                                                                       | HRV metrics                                                                                                                                                                                                                                                    | Confounding factors                                                                                                                              | Spectral analysis                                                                                                       | Recording technique                                               |
|-----------|------|---------------------------------------------------------------------------------------------------------------------------------------------------------------------------------------------------------------------------------------------------------------------------------|----------------------------------------------------------------------------------------------------------------------------------------------------------------------------------------------------------------------------------------------------------------|--------------------------------------------------------------------------------------------------------------------------------------------------|-------------------------------------------------------------------------------------------------------------------------|-------------------------------------------------------------------|
| [15]      | 2006 | Blood pressure, Myocardial infraction (SNS↑ and PNS↓), Nervous system, Diabetes (HRV all indices↓), Cardiac arrhythmia, Renal failure, Brain damage, Depression (↓all cyclic changes), Diabetic neuropathy (PNS↓, Power spectrum indices↓)                                      | SDNN,SENN, SDSD,RMSSD, NN50,pNN50, RR triangular index, TINN, Poincare geometry, Correlation dimension analysis, Detrended fluctuation analysis, Largest Lyapunov exponent, Approximate entropy, Hurst exponent (H), Sample entropy (SampEn), Recurrence plots | Gender (HRV↓ with age and variation is more in the case of females than men.), Age, Smoking(↑ SNS, ↓PNS), Drugs, Alcohol (HRV ↓), Infants, Sleep | FFT, Short-time FFT, AR method, Higher order spectra, Wavelet transform, and Continuous time wavelet transform analysis | ECG                                                               |
| [16]      | 2006 | Myocardial Infarction, Heart Failure, Sudden death                                                                                                                                                                                                                              | SDNN, SDANN, PNN50, RMSSD, PSD, LF, HF, LF/HF, detrended fluctuation analysis(DFA), approximate entropy                                                                                                                                                        | Cardiovascular Drugs                                                                                                                             | FFT                                                                                                                     | Holter monitor                                                    |
| [17]      | 2009 | Physical exercise, Essential arterial hypertension (LF↑), Myocardial infarction, Transient myocardial ischemia, Congestive heart failure                                                                                                                                        | LF/HF                                                                                                                                                                                                                                                          | Posture (tilt and rest)                                                                                                                          | FFT algorithm and AR modeling                                                                                           | Not Available                                                     |
| [18]      | 2011 | Myocardial infarction, Diabetes, Hypertension, Heart failure, Fetal stress, Acute myocardial ischemia, Ventricular fibrillation                                                                                                                                                 | SDNN, SDANN, SDNNi, RMSSD, NN50, PNN50, Triangular index, TINN, TP, ULF, VLF, HF, LF, Lf nu, Hf nu, LF/HF, Chaos theory                                                                                                                                        | RSA, Baroreflex, Exercise, Postural changes, Obesity, Work stress, Smoking                                                                       | Not Available                                                                                                           | ECG, kymograph, and Holter device                                 |
| [19]      | 2012 | Diabetes, Cardiovascular risk factors, Atherosclerosis, Coronary artery disease, Ischemic sudden death, Coronary instability, Heart failure                                                                                                                                     | SDNN, SDANN, RMSSD, SDNN Index, SDSD, NN50, pNN50, TP, VLF, LF norm, LF, HF norm, HF, LF/HF, ULF                                                                                                                                                               | Circadian pattern, Aging, Gender, Ethnicity                                                                                                      | FFT and AR                                                                                                              | Not Available                                                     |
| [20]      | 2012 | Not Available                                                                                                                                                                                                                                                                   | HF, LF, VLF, ULF, DFA, SDNN, RMSSD, SDANN, PNN50                                                                                                                                                                                                               | Not Available                                                                                                                                    | FFT                                                                                                                     | Holter monitor                                                    |
| [21]      | 2013 | Diabetes, Myocardial infarction, Nonischemic cardiomyopathy, Heart failure, Endocrinopathies (mostly in diabetes), Sudden death, All-cause mortality, CHF, Cardiac autonomic dysfunction (CAN), Stroke, Multiple sclerosis, Muscular dystrophies, Parkinson's disease, Epilepsy | SDNN, RMSSD, PNN50, Triangular index, LF, HF, VLF, ULF, LF/HF, TP, DFA, Power law relationship analysis, Approximate entropy, PD2i                                                                                                                             | Age, Gender, Drugs                                                                                                                               | FFT                                                                                                                     | ECG recordings                                                    |
| [22]      | 2013 | Not Available                                                                                                                                                                                                                                                                   | Mean NN, mean HR Mean of all NN intervals, SDNN, RMSSD, SDSD, NN50/PNN50 (PNN10), ULF, VLF, LF, HF, TP, SD1, SD2, ApEn, SampEn                                                                                                                                 | Not Available                                                                                                                                    | Not Available                                                                                                           | PPG signal, Finapres™system, and Impedance plethysmography system |
| [23]      | 2013 | Not Available                                                                                                                                                                                                                                                                   | HF, LF, LF/HF, TP, VLF                                                                                                                                                                                                                                         | RSA, Blood pressure, Physically Active and Sedentary, Tilt                                                                                       | FFT and AR Technique                                                                                                    | Not Available                                                     |

Continued on next page

Table S2 continued from previous page

| Reference | Year | Condition                                                                                   | HRV metrics                                                                                                                                                                                                                                                                                             | Confounding factors                                                                                                                                                                                                                                                                                                                                                                                                                                          | Spectral analysis        | Recording technique     |
|-----------|------|---------------------------------------------------------------------------------------------|---------------------------------------------------------------------------------------------------------------------------------------------------------------------------------------------------------------------------------------------------------------------------------------------------------|--------------------------------------------------------------------------------------------------------------------------------------------------------------------------------------------------------------------------------------------------------------------------------------------------------------------------------------------------------------------------------------------------------------------------------------------------------------|--------------------------|-------------------------|
| [24]      | 2015 | Myocardial infarction, Congestive heart failure, Subjects without evidence of heart disease | Entropy and regularity, Nonlinear dynamical systems and chaotic behaviour, Long-range correlation and fractal scaling, Short-term complexity, Standard time and frequency-domain parameters                                                                                                             | Not Available                                                                                                                                                                                                                                                                                                                                                                                                                                                | Not Available            | Not Available           |
| [25]      | 2016 | Not Available                                                                               | SDNN, SDANN, and SDNNi, RMSSD, PNN50, HF, LF, ULF, VLF, LF/HF, Fractal mathematics and chaotic dynamics                                                                                                                                                                                                 | RSA, Arterial pressure fluctuations, Tilt, Supine, Mayer wave oscillations                                                                                                                                                                                                                                                                                                                                                                                   | AR models and FFT        | ECG                     |
| [26]      | 2017 | Athlete performance gains, chronic pain patients                                            | SDNN, SDRR, SDANN, SDNN Index (SDNNI), PNN50, RMSSD, Triangular index, TINN, ULF, VLF, LF peak, LF power, LF power nu, LF power %, HF peak, HF power, HF power nu, HF power %, LF/HF, Poincaré plot(S, SD1, SD2, AND SD1/SD2), Approximate entropy, Sample entropy, DFA, Correlation dimension (CD, D2) | Respiration, Paced Breathing, Age, Sex, Heart Rate, Health, position                                                                                                                                                                                                                                                                                                                                                                                         | AR and FFT               | ECG, PPG, and Portapres |
| [27]      | 2017 | Not Available                                                                               | SDNN, SDANN, RMSSD, NN50, PNN50, Triangular index, Poincare-plot, PSD, TP, VLF, LF, HF, LF/HF, ULF, Entropy, Fractal Analysis                                                                                                                                                                           | Sex (↓in women), Age (all parameters except ULF↓), Weight, Food intake(Dietary restriction: HF↑, LF↓), Ethnicity, Circadian effects(SDNN↑ at night in one study. Most parameters decreased at night), Sleep (REM sleep: TP, VLF, LF↑, LF ↓. Non-REM sleep: TP, VLF, LF ↓, LF↑. In light sleep, SDNN, LF and LF/HF values are similar to wakefulness. Sleep deprivation: LF↑, conflicting results), Regular exercise(SDNN, TP, HF, fractal dimension↑), drugs | FFT and Wavelet analysis | Not Available           |

Continued on next page

Table S2 continued from previous page

| Reference | Year | Condition                                                                                                                                                                                                                        | HRV metrics                                                                                                                                                                                                                                       | Confounding factors                                                                                                            | Spectral analysis                                                                                                                                      | Recording technique                                                                                                                                                                                                                                                                                            |
|-----------|------|----------------------------------------------------------------------------------------------------------------------------------------------------------------------------------------------------------------------------------|---------------------------------------------------------------------------------------------------------------------------------------------------------------------------------------------------------------------------------------------------|--------------------------------------------------------------------------------------------------------------------------------|--------------------------------------------------------------------------------------------------------------------------------------------------------|----------------------------------------------------------------------------------------------------------------------------------------------------------------------------------------------------------------------------------------------------------------------------------------------------------------|
| [28]      | 2019 | Not Available                                                                                                                                                                                                                    | SDNN, PNN50, RMSSD, TP, VLF, LF, HF, SD1,SD2                                                                                                                                                                                                      | Position(Supine, Tilt/recovery, Sitting, Standing, Active), Gender                                                             | Not Available                                                                                                                                          | ECG, Portable devices (Elite HRV, Finapress PPG cuff, GOW Shirt, HRV4Training PPG, iPhone 4S, Ithlete PPG, Ithlete Chest Strap, Motorola Droid, Polar H7, Polar RS800, Polar RS800CX, Polar RS800G3, Polar S810, Polar S810i, Polar T31 Advantage, Polar T31 Armband, Polar T31 Counter, Polar V800, SUUNTOt6) |
| [29]      | 2019 | Cardiac Autonomic Function, Multiple organ dysfunction syndrome, Sepsis, Chronic heart failure, Chronic kidney disease, Atherosclerosis, Myocardial infarction, Cardiac death, Idiopathic dilated cardiomyopathy, Blood pressure | LF, HF, ULF, LF/HF, SDNN                                                                                                                                                                                                                          | Circadian rhythm                                                                                                               | FFT, AR, Trigonometric regressive spectral (TRS) analysis, Multiple TRS analysis(MTRS), Yule-Walker method and Burg algorithm, Wavelet analysis, SPWVD | ECG and holter recordings                                                                                                                                                                                                                                                                                      |
| [30]      | 2019 | Intensive care medicine, Multiorgan dysfunction syndrome, Sepsis, Inflammation, Cardiovascular disorders, Arrhythmias, Cardiac arrest, Neurological disorders                                                                    | SDNN, SDANN, RMSSD, SDNNi, SDSD, NN50, pNN50, Triangular index (TINN), Differential index Logarithmic index, Total power, VLF, LF, LF norm, HF, HF norm, LF/HF, $\alpha$ , S, SD1, SD2, SD1/SD2, ApEn, SampEn, DFA $\alpha$ 1, DFA $\alpha$ 2, D2 | Age, Gender, Resting heart rate, Recent physical activity, Illness, Arrhythmias, Ectopic beats                                 | FFT analysis                                                                                                                                           | ECG recordings                                                                                                                                                                                                                                                                                                 |
| [31]      | 2020 | Myocardial ischemia, Heart diseases, Heart failure                                                                                                                                                                               | LF, HF, PSD                                                                                                                                                                                                                                       | Respiration, Standing, Exercise, Blood pressure, Body position, Location and body position, Body and environmental temperature | Not Available                                                                                                                                          | ECG and PPG                                                                                                                                                                                                                                                                                                    |
| [32]      | 2021 | Cognitive performance, Individualized training                                                                                                                                                                                   | SDNN, RMSSD, HF, LF, ULF, LF/HF                                                                                                                                                                                                                   | Not Available                                                                                                                  | FFT                                                                                                                                                    | Holter ECGs(multi and single lead), Bittium FarosTM 360, Actiheart, Firstbeat Bodyguard 2, Aidlab, PolarH10, Equivital EQ-02, Biovotion Everion, PPG (Empatica E4, Polar Vantage V, GarminWatches, Actigraph wGT3X-BT, Oura ring, AVA bracelet, and Sosche Rhythm 24TM)                                        |

Continued on next page

Table S2 continued from previous page

| Reference | Year   | Condition                                                                                                                                                                                                                                | HRV metrics                                                                                                                                                                                 | Confounding factors                                                                                                                                                                                                                                                                                                             | Spectral analysis | Recording technique                                                                                                                                                                                                             |
|-----------|--------|------------------------------------------------------------------------------------------------------------------------------------------------------------------------------------------------------------------------------------------|---------------------------------------------------------------------------------------------------------------------------------------------------------------------------------------------|---------------------------------------------------------------------------------------------------------------------------------------------------------------------------------------------------------------------------------------------------------------------------------------------------------------------------------|-------------------|---------------------------------------------------------------------------------------------------------------------------------------------------------------------------------------------------------------------------------|
| [33]      | 2021   | Heart failure, Neuro-cardio parameter, Medicine, Morbidity and mortality, Regular monitoring of patients with critical injury                                                                                                            | Not Available                                                                                                                                                                               | Age, Gender, Circadian rhythm, Physical exercise, HR, Respiration, Inflammation and infection, Viral infection, sepsis, Inflammation, Genetic factors, social stress, Noise increase, Depression, Chronic stress, Body mass index, Coffee consumption, Smoking, Alcohol consumption and cigarette smoking, Alternative medicine | Not Available     | Not Available                                                                                                                                                                                                                   |
| [34]      | 2021   | Post-MI patients, Cardiac death, Estimation of sleep stage by HRV, Sleep apnea                                                                                                                                                           | Hypnogram, body motion (BM) by actigraphy, R-R interval (RRI), Power spectral density (PSD), and relative power of HF to the integrated width (w) of the frequency band around the HF peak. | Not Available                                                                                                                                                                                                                                                                                                                   | Not Available     | Not Available                                                                                                                                                                                                                   |
| [35]      | ∞ 2021 | Stress, Drowsiness, Video Game                                                                                                                                                                                                           | SDNN, RMSSD, PNN50, LF, HF, LF/HF, SD1, SD2, ApEn, GSR std, GSR mean, RESP rate, VLF                                                                                                        | Stress, Drowsiness, Awake, Fatigue                                                                                                                                                                                                                                                                                              | Not Available     | Cardiotachometer, ECG (2 lead, 12 lead), PPG, Holter ECG, Polar RS800, GE light ECG, Clickholter ECG, RM6240B ECG, MP150 Biopac, Gear S PPG, eMotion Faros, eXim Pro, RespiBAN, Empatica E4, Biopac PPG, EDA, and UIM           |
| [36]      | 2022   | Medical Decision support, Cardiology, Mental health, Sleep health, Lifestyle, Intensive Care Unit (ICU) settings, Remote monitoring, Comorbid conditions, Oncology, Brain health, Diabetes, Epilepsy, Respiratory disease, Infant health | Not Available                                                                                                                                                                               | Blood pressure, Addiction, Drug abuse                                                                                                                                                                                                                                                                                           | Not Available     | ECG recording setup and PPG                                                                                                                                                                                                     |
| [37]      | 2022   | Cardiology, Diabetes Detection and Management, Sleep medicine, Stress, Guide endurance training, Mental health applications                                                                                                              | SDNN, SDANN, RMSSD, Power(ULF, VLF, LF, HF), Peak(ULF, VLF, LF, HF), LF:HF, S, ApEn, DFA $\alpha 1$ , $\alpha 2$                                                                            | Not Available                                                                                                                                                                                                                                                                                                                   | Not Available     | ECG, PPG, Accelerometers and gyroscopes, Holter monitors, iRhythm Zio, Medtronic, Polar OH1, Wahoo TICKR X, Fitbit Versa smartwatch, Garmin Vivosmart 4, Everion, Apple watch 6, Fitbit Luxe, Polar H7, and Zephyr Bioharness 3 |

Continued on next page



Table S2 continued from previous page

| Reference | Year | Condition                                                                                                                                                                                                                                                                      | HRV metrics                                                                                                                  | Confounding factors | Spectral analysis | Recording technique                      |
|-----------|------|--------------------------------------------------------------------------------------------------------------------------------------------------------------------------------------------------------------------------------------------------------------------------------|------------------------------------------------------------------------------------------------------------------------------|---------------------|-------------------|------------------------------------------|
| [38]      | 2022 | Smartwatch, mHealth                                                                                                                                                                                                                                                            | Not Available                                                                                                                | Not Available       | Not Available     | Mobile ECG, Samsung, Fit-bit, and Garmin |
| [39]      | 2023 | Diabetes Detection, Sleep Apnea Detection, myocardial infarction, Cardiac arrhythmia, Hypertension, Renal failure, Psychiatric disorders, ANS Activity of Patients undergoing Weaning from Mechanical Ventilation, and monitoring of fetal distress and neonatal critical care | SDNN, RMSSD, NN50, PNN50, TINN, PSD, TP, HF, LF, ULF, VLF, LF/HF, Poincare plot, DFA, Recurrence plot, Chaos theory, Entropy | Alcohol             | FFT and AR        | ECG                                      |

## References

- [1] M. Malik and A. J. Camm, "Heart rate variability," *Clinical cardiology*, vol. 13, no. 8, pp. 570–576, 1990.
- [2] P. K. Stein, M. S. Bosner, R. E. Kleiger, and B. M. Conger, "Heart rate variability: a measure of cardiac autonomic tone," *American heart journal*, vol. 127, no. 5, pp. 1376–1381, 1994.
- [3] E. Kristal-Boneh, M. Raifel, P. Froom, and J. Ribak, "Heart rate variability in health and disease," *Scandinavian journal of work, environment & health*, pp. 85–95, 1995.
- [4] M. J. Cowan, "Measurement of heart rate variability," *Western journal of nursing research*, vol. 17, no. 1, pp. 32–48, 1995.
- [5] F. Lombardi, A. Malliani, M. Pagani, and S. Cerutti, "Heart rate variability and its sympatho-vagal modulation," *Cardiovascular research*, vol. 32, no. 2, pp. 208–216, 1996.
- [6] J. Kautzner and A. John Camm, "Clinical relevance of heart rate variability," *Clinical cardiology*, vol. 20, no. 2, pp. 162–168, 1997.
- [7] A. Stys and T. Stys, "Current clinical applications of heart rate variability," *Clinical cardiology*, vol. 21, no. 10, pp. 719–724, 1998.
- [8] H. V. Huikuri, T. Mäkikallio, K. J. Airaksinen, R. Mitrani, A. Castellanos, and R. J. Myerburg, "Measurement of heart rate variability: a clinical tool or a research toy?," *Journal of the American College of Cardiology*, vol. 34, no. 7, pp. 1878–1883, 1999.
- [9] P. Stein, PhD and R. Kleiger, MD, "Insights from the study of heart rate variability," *Annual review of medicine*, vol. 50, no. 1, pp. 249–261, 1999.
- [10] H. Kobayashi, K. Ishibashi, and H. Noguchi, "Heart rate variability; an index for monitoring and analyzing human autonomic activities," *Applied Human Science*, vol. 18, no. 2, pp. 53–59, 1999.
- [11] L. Hejmel and I. Gál, "Heart rate variability analysis," *Acta Physiologica Hungarica*, vol. 88, no. 3-4, pp. 219–230, 2001.
- [12] F. Lombardi, "Clinical implications of present physiological understanding of hrv components," *Cardiac electrophysiology review*, vol. 6, pp. 245–249, 2002.
- [13] G. Parati and M. Di Rienzo, "Determinants of heart rate and heart rate variability," *Journal of hypertension*, vol. 21, no. 3, pp. 477–480, 2003.
- [14] R. E. Kleiger, P. K. Stein, and J. T. Bigger Jr, "Heart rate variability: measurement and clinical utility," *Annals of Noninvasive Electrocardiology*, vol. 10, no. 1, pp. 88–101, 2005.
- [15] U. Rajendra Acharya, K. Paul Joseph, N. Kannathal, C. M. Lim, and J. S. Suri, "Heart rate variability: a review," *Medical and biological engineering and computing*, vol. 44, pp. 1031–1051, 2006.
- [16] K. C. Bilchick and R. D. Berger, "Heart rate variability," *Journal of cardiovascular electrophysiology*, vol. 17, no. 6, pp. 691–694, 2006.
- [17] N. Montano, A. Porta, C. Cogliati, G. Costantino, E. Tobaldini, K. R. Casali, and F. Iellamo, "Heart rate variability explored in the frequency domain: a tool to investigate the link between heart and behavior," *Neuroscience & Biobehavioral Reviews*, vol. 33, no. 2, pp. 71–80, 2009.
- [18] G. E. Billman, "Heart rate variability—a historical perspective," *Frontiers in physiology*, vol. 2, p. 86, 2011.
- [19] B. Xhyheri, O. Manfrini, M. Mazzolini, C. Pizzi, and R. Bugiardini, "Heart rate variability today," *Progress in cardiovascular diseases*, vol. 55, no. 3, pp. 321–331, 2012.
- [20] M. A. Peltola, "Role of editing of r-r intervals in the analysis of heart rate variability," *Frontiers in physiology*, vol. 3, p. 148, 2012.
- [21] I. Cygankiewicz and W. Zareba, "Heart rate variability," *Handbook of clinical neurology*, vol. 117, pp. 379–393, 2013.
- [22] A. Schäfer and J. Vagedes, "How accurate is pulse rate variability as an estimate of heart rate variability?: A review on studies comparing photoplethysmographic technology with an electrocardiogram," *International journal of cardiology*, vol. 166, no. 1, pp. 15–29, 2013.
- [23] G. A. Reyes del Paso, W. Langewitz, L. J. Mulder, A. Van Roon, and S. Duschek, "The utility of low frequency heart rate variability as an index of sympathetic cardiac tone: a review with emphasis on a reanalysis of previous studies," *Psychophysiology*, vol. 50, no. 5, pp. 477–487, 2013.

- [24] R. Sassi, S. Cerutti, F. Lombardi, M. Malik, H. V. Huikuri, C.-K. Peng, G. Schmidt, Y. Yamamoto, D. Re-viewers:, B. Gorenek, *et al.*, “Advances in heart rate variability signal analysis: joint position statement by the e-cardiology esc working group and the european heart rhythm association co-endorsed by the asia pacific heart rhythm society,” *Ep Europace*, vol. 17, no. 9, pp. 1341–1353, 2015.
- [25] A. E. Draghici and J. A. Taylor, “The physiological basis and measurement of heart rate variability in humans,” *Journal of physiological anthropology*, vol. 35, pp. 1–8, 2016.
- [26] F. Shaffer and J. P. Ginsberg, “An overview of heart rate variability metrics and norms,” *Frontiers in public health*, p. 258, 2017.
- [27] G. Ernst, “Hidden signals—the history and methods of heart rate variability. front public health. 2017 oct; 5: 265,” 2017.
- [28] W. C. Dobbs, M. V. Fedewa, H. V. MacDonald, C. J. Holmes, Z. S. Cicone, D. J. Plews, and M. R. Esco, “The accuracy of acquiring heart rate variability from portable devices: a systematic review and meta-analysis,” *Sports Medicine*, vol. 49, pp. 417–435, 2019.
- [29] K. Li, H. Rüdiger, and T. Ziemssen, “Spectral analysis of heart rate variability: time window matters,” *Frontiers in Neurology*, vol. 10, p. 545, 2019.
- [30] B. W. Johnston, R. Barrett-Jolley, A. Krige, and I. D. Welters, “Heart rate variability: Measurement and emerging use in critical care medicine,” *Journal of the Intensive Care Society*, vol. 21, no. 2, pp. 148–157, 2020.
- [31] E. Yuda, M. Shibata, Y. Ogata, N. Ueda, T. Yambe, M. Yoshizawa, and J. Hayano, “Pulse rate variability: a new biomarker, not a surrogate for heart rate variability,” *Journal of physiological anthropology*, vol. 39, no. 1, pp. 1–4, 2020.
- [32] K. Hinde, G. White, and N. Armstrong, “Wearable devices suitable for monitoring twenty four hour heart rate variability in military populations,” *Sensors*, vol. 21, no. 4, p. 1061, 2021.
- [33] R. Tiwari, R. Kumar, S. Malik, T. Raj, and P. Kumar, “Analysis of heart rate variability and implication of different factors on heart rate variability,” *Current cardiology reviews*, vol. 17, no. 5, pp. 74–83, 2021.
- [34] J. Hayano and E. Yuda, “Assessment of autonomic function by long-term heart rate variability: Beyond the classical framework of lf and hf measurements,” *Journal of physiological anthropology*, vol. 40, no. 1, p. 21, 2021.
- [35] S. Ishaque, N. Khan, and S. Krishnan, “Trends in heart-rate variability signal analysis,” *Frontiers in Digital Health*, vol. 3, p. 639444, 2021.
- [36] O. Faust, W. Hong, H. W. Loh, S. Xu, R.-S. Tan, S. Chakraborty, P. D. Barua, F. Molinari, and U. R. Acharya, “Heart rate variability for medical decision support systems: A review,” *Computers in Biology and Medicine*, vol. 145, p. 105407, 2022.
- [37] N. Alugubelli, H. Abuissa, and A. Roka, “Wearable devices for remote monitoring of heart rate and heart rate variability—what we know and what is coming,” *Sensors*, vol. 22, no. 22, p. 8903, 2022.
- [38] S. Gupta, A. Mahmoud, and M. R. Massoomi, “A clinician’s guide to smartwatch “interrogation”,” *Current Cardiology Reports*, vol. 24, no. 8, pp. 995–1009, 2022.
- [39] S. K. Nayak, B. Pradhan, B. Mohanty, J. Sivaraman, S. S. Ray, J. Wawrzyniak, M. Jarzebski, and K. Pal, “A review of methods and applications for a heart rate variability analysis,” *Algorithms*, vol. 16, no. 9, p. 433, 2023.
